# Supplementary material for: In situ formed [M(CN)9] (M = W, Mo) as a building block for the construction of two nona-cyanometalate-bridged heterometallic coordination polymers
Source: Royal Society of Chemistry journal article supplement (doi:10.1039/c9ce00579j), 2019-01-01
Supplement: c9ce00579j1.pdf [file c9ce00579j1.pdf]

## <Electronic Supplementary Information>

# In-Situ Formed [M(CN)<sub>9</sub>] (M = W, Mo) as Building Block for the Construction of Two Nona-Cyanometalate-Bridged Heterometallic Coordination Polymers

**Jun Qian,<sup>a,b</sup> Hirofumi Yoshikawa,<sup>c</sup> Mark G. Humphrey,<sup>a,d</sup> Jinfang Zhang,<sup>a</sup>  
Kunio Awaga,<sup>c</sup> Chi Zhang<sup>\*,a,b</sup>**

<sup>a</sup> *China-Australia Joint Research Center for Functional Molecular Materials, School of Chemistry and Chemical Engineering, Jiangsu University, Zhenjiang 212013, P. R. China*

<sup>b</sup> *China-Australia Joint Research Center for Functional Molecular Materials, School of Chemical Science and Engineering, Tongji University, Shanghai 200092, P. R. China*

<sup>c</sup> *Research Center for Materials Science, Department of Chemistry, Graduate School of Science, Nagoya University, Furo-cho, Chikusa-ku, Nagoya 464-8602, Japan*

<sup>d</sup> *Research School of Chemistry, Australian National University, Canberra, ACT 2601, Australia*

### Corresponding Author

\*Prof. Dr. Chi Zhang: E-mail: [chizhang@ujs.edu.cn](mailto:chizhang@ujs.edu.cn); Fax: +86-511-88797815.

## Supplementary Index

|                                                                             |     |
|-----------------------------------------------------------------------------|-----|
| 1. Topological analysis of compounds 1 and 2.....                           | S3  |
| 2. IR spectrum of CP-1 .....                                                | S4  |
| 3. IR spectrum of CP-2 .....                                                | S5  |
| 4. Powder XRD of CP-1 .....                                                 | S6  |
| 5. Powder XRD of CP-1 .....                                                 | S7  |
| 6. Connecting modes of molecular building blocks [M(CN) <sub>9</sub> ]..... | S8  |
| 7. Packing structure of 1 and 2 viewed along the <i>b</i> axis.....         | S9  |
| 8. TG curve of compound 1 .....                                             | S10 |
| 9. TG curve of compound 2 .....                                             | S11 |

## 1. Topological analysis

The topological structures of compounds **1** and **2** were both analyzed by programs OLEX<sup>S1</sup> and TOPOS<sup>S2</sup> with the CIF files. The topological cell of OLEX shows that the short (Schläfli) symbol of the net for **mot** is  $\{6^6\}\{6^4\cdot 8^2\}_2$ , which is consistent with the result of TOPOS.

### References:

- S1. O. V. Dolomanov, A. J. Blake, N. R. Champness, M. Schröder, *J. Appl. Cryst.* 2003, **36**, 1283–1284.
- S2. C. Bonneau, O. Delgado-Friederichs, M. O’Keeffe, O. M. Yaghi, *Acta Cryst. A* 2004, **60**, 517–520.

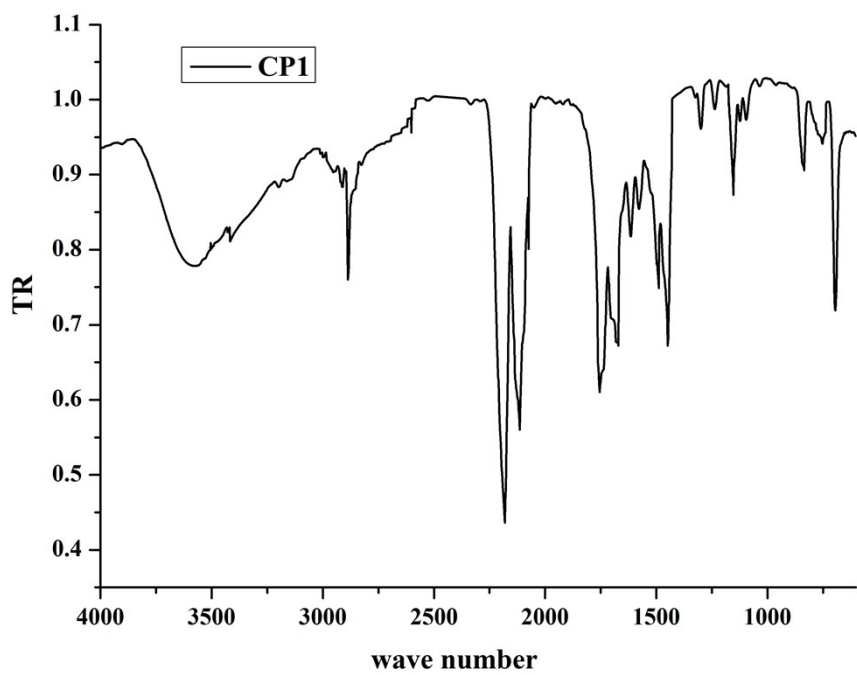

**Fig. S1** IR spectrum of CP-1.

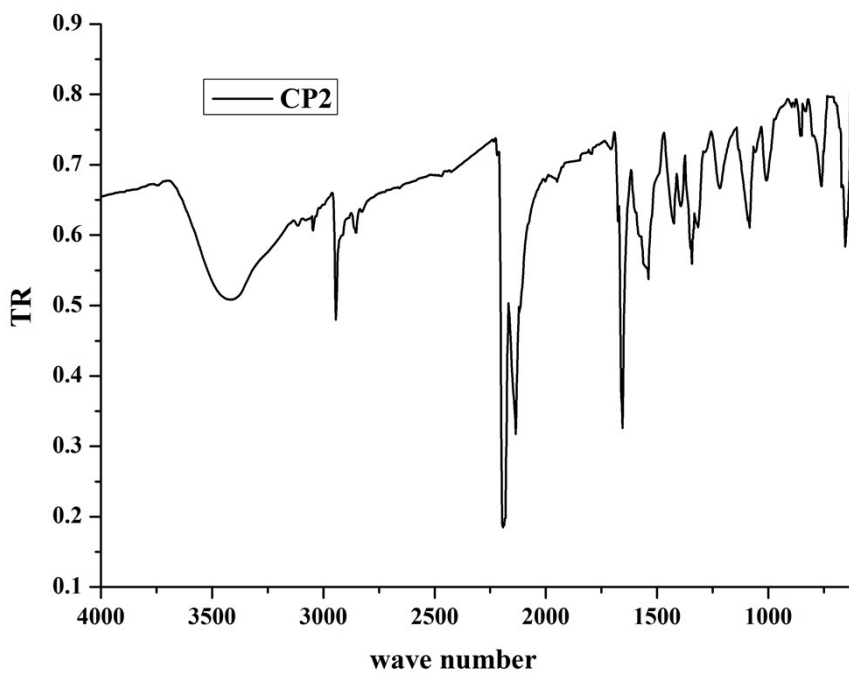

**Fig. S2** IR spectrum of CP-2.

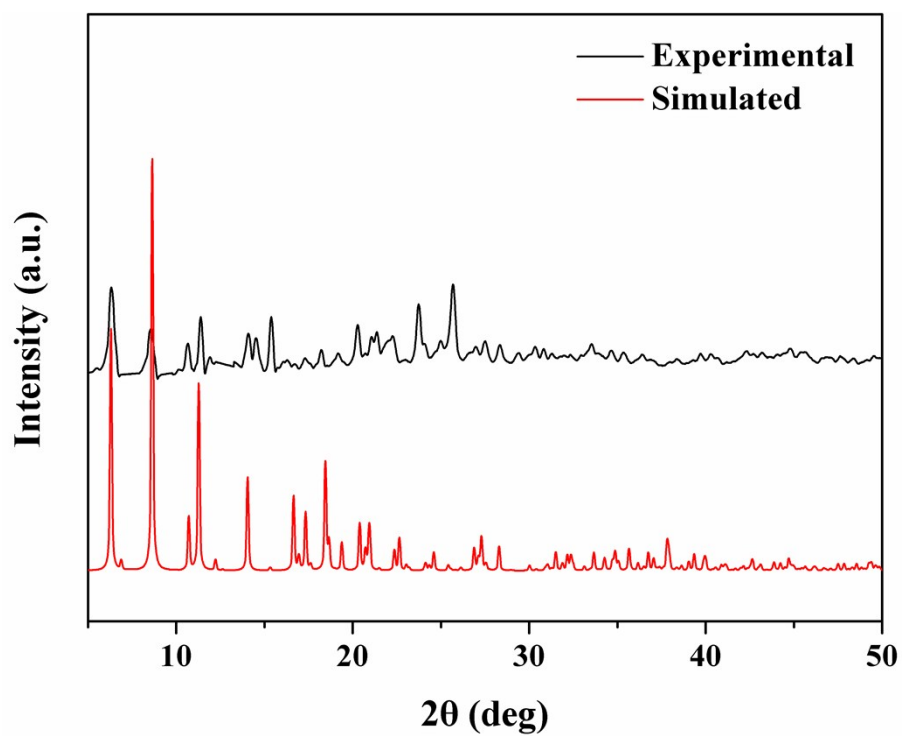

**Fig. S3** The experimental powder X-ray diffraction pattern (wavelength  $\lambda = 1.5406 \text{ \AA}$ ) of CP-1. The simulated diffraction pattern generated from the single-crystal X-ray diffraction data is given for comparison.

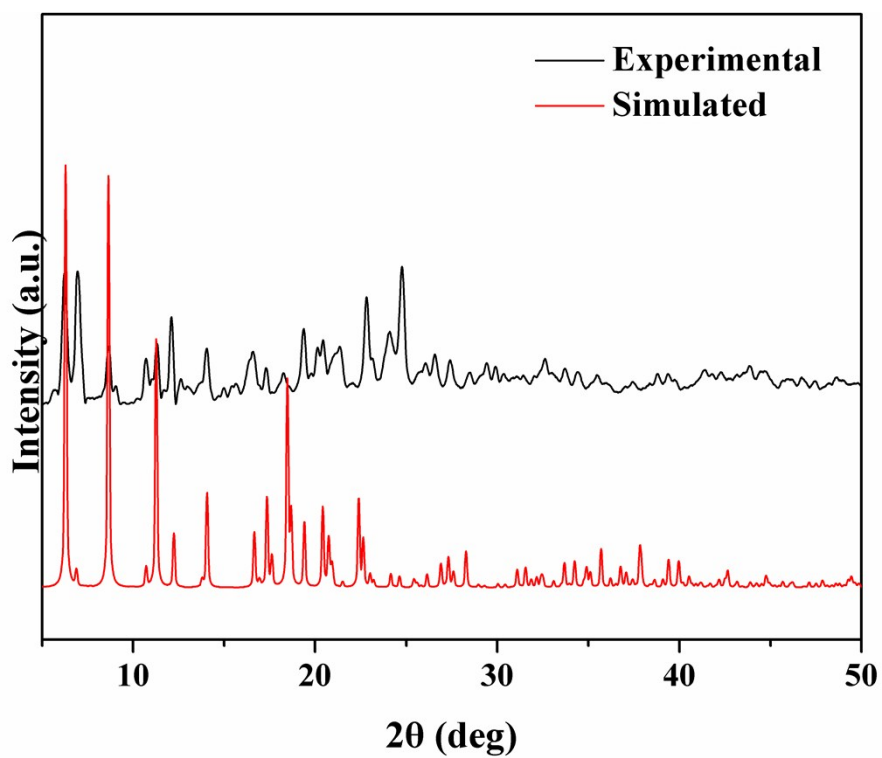

**Fig. S4** The experimental powder X-ray diffraction pattern (wavelength  $\lambda = 1.5406 \text{ \AA}$ ) of CP-2. The simulated diffraction pattern generated from the single-crystal X-ray diffraction data is given for comparison.

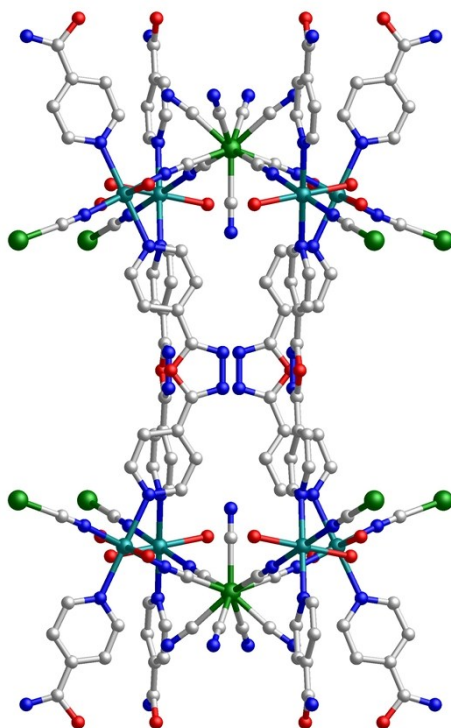

**Fig. S5** The connection mode of building blocks  $[M(CN)_9]^{4-}$  ( $M = W, Mo$ ) (W, Mo, green; Mn, cyan; C, gray; N, blue; O, red). All the hydrogen atoms are omitted for clarity.



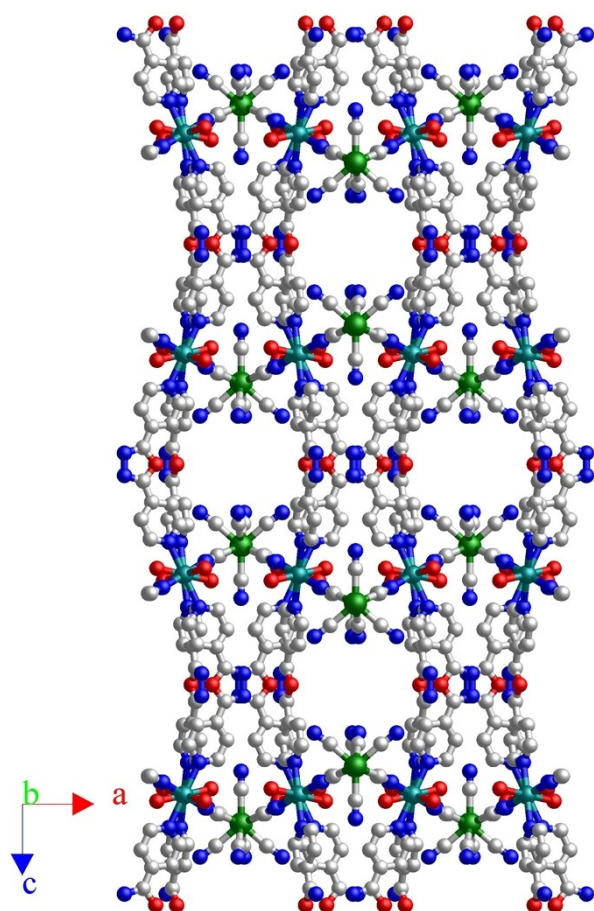

**Fig. S6** Packing structure of CPs **1** and **2** viewed along the *b* axis (W, Mo, green; Mn, cyan; C, gray; N, blue; O, red). Carbon and nitrogen atoms in DMF molecules as well as all the hydrogen atoms are omitted for clarity.

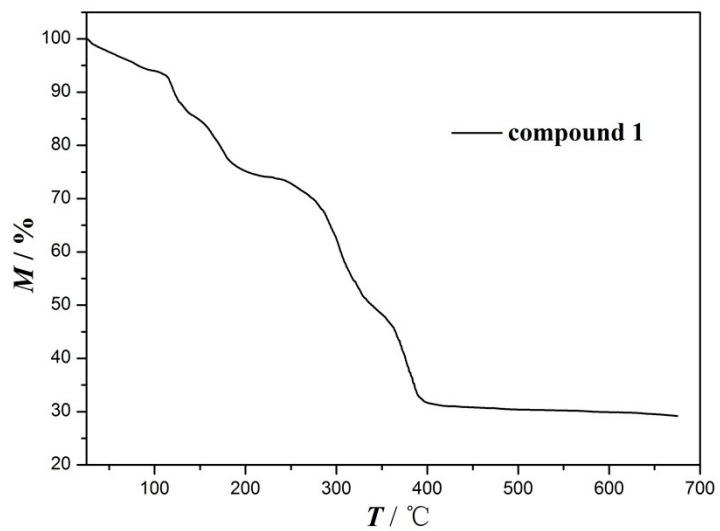

**Fig. S7** TG curve of CP **1**. The TG curve shows that CP **1** releases a solvent DMF molecule and four coordinated DMF molecules per formula unit below 250 °C.

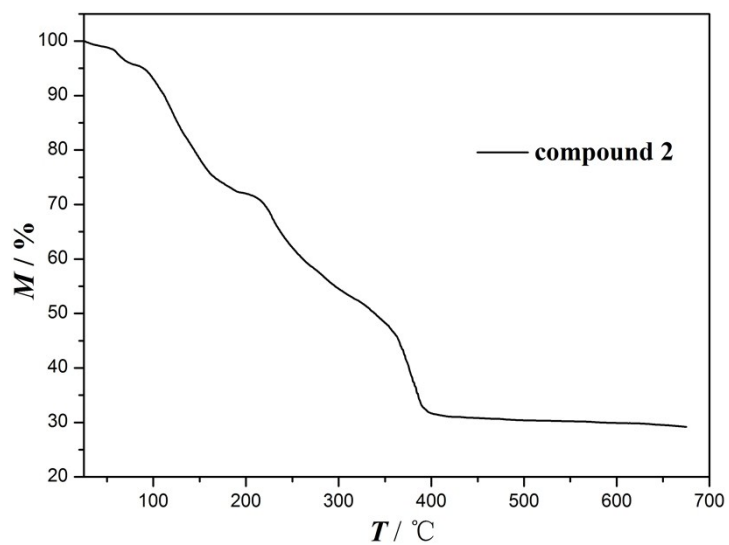

**Fig. S8** TG curve of CP **2**. The TG curve shows that CP **2** releases a solvent DMF molecule and four coordinated DMF molecules per formula unit below 250 °C.
